# Supplementary material for: Climate change effects on Black Sigatoka disease of banana
Source: Philos Trans R Soc Lond B Biol Sci. 2019 May 6;374(1775):20180269. doi: 10.1098/rstb.2018.0269 (PMC6553611; doi:10.1098/rstb.2018.0269)
Supplement: CReg.csv [file rstb20180269supp5.csv]

Time	CT	RH
1691808	20.6945190429688	95.4538650512695
1691811	19.7003784179688	94.8124694824219
1691814	19.2904052734375	94.726203918457
1691817	19.44921875	91.4837341308594
1691820	19.4568786621094	92.3818511962891
1691823	22.6651000976562	86.5115814208984
1691826	26.3558349609375	77.5346908569336
1691829	25.8991088867188	77.3649444580078
1691832	21.4508056640625	92.5805435180664
1691835	20.0519409179688	95.4415969848633
1691838	20.0631408691406	96.2736740112305
1691841	20.0173950195312	95.9631195068359
1691844	19.855224609375	95.0486145019531
1691847	20.7630615234375	95.9208526611328
1691850	22.4147338867188	92.5315246582031
1691853	23.1213989257812	89.4515228271484
1691856	21.0617370605469	94.7240676879883
1691859	20.5023803710938	97.6975479125977
1691862	20.3525390625	96.3044128417969
1691865	20.4807739257812	97.6718292236328
1691868	20.5261840820312	96.8907470703125
1691871	21.4532775878906	98.4042053222656
1691874	21.6343383789062	96.040641784668
1691877	23.39111328125	90.0089569091797
1691880	21.0885009765625	96.5596694946289
1691883	20.5320434570312	96.9932708740234
1691886	20.4103698730469	96.2263565063477
1691889	20.4202880859375	97.0546340942383
1691892	20.2908325195312	96.4084167480469
1691895	22.5791320800781	93.7228622436523
1691898	24.6798095703125	85.5
1691901	25.3469543457031	83.7990188598633
1691904	21.5546569824219	96.0346908569336
1691907	20.2517700195312	96.4897155761719
1691910	20.3568115234375	95.5281600952148
1691913	20.2529296875	96.5578689575195
1691916	20.4112854003906	97.5845642089844
1691919	21.4450073242188	98.8023071289062
1691922	22.1482543945312	95.180046081543
1691925	23.14306640625	90.3407821655273
1691928	20.840576171875	96.2344284057617
1691931	20.36962890625	97.5698165893555
1691934	20.1946716308594	96.9544448852539
1691937	20.166259765625	97.1172637939453
1691940	20.045166015625	96.2491149902344
1691943	21.5694580078125	98.3805923461914
1691946	23.0741577148438	91.0664215087891
1691949	23.8497009277344	86.9528503417969
1691952	20.7859497070312	95.3785247802734
1691955	20.1371765136719	97.4697341918945
1691958	20.0667724609375	97.7217178344727
1691961	20.2415771484375	97.5104598999023
1691964	20.0583801269531	96.1477661132812
1691967	21.8143310546875	97.4407196044922
1691970	25.61572265625	84.3740539550781
1691973	26.0064697265625	81.0524139404297
1691976	21.5383911132812	94.0626983642578
1691979	20.2969360351562	93.4875640869141
1691982	18.8283081054688	92.6387557983398
1691985	18.1814575195312	93.2260894775391
1691988	18.5478515625	94.9359512329102
1691991	24.4362182617188	85.7685928344727
1691994	27.045166015625	79.1017074584961
1691997	24.2146606445312	89.8855438232422
1692000	21.8499145507812	97.2346725463867
1692003	20.4966430664062	94.08935546875
1692006	19.2557373046875	93.2472686767578
1692009	17.8001098632812	85.2676467895508
1692012	16.9761657714844	87.2607345581055
1692015	23.9496765136719	74.7659912109375
1692018	27.5794067382812	73.592643737793
1692021	26.8960571289062	77.5670700073242
1692024	21.9199829101562	94.3733673095703
1692027	20.7900695800781	97.1918487548828
1692030	19.3184814453125	94.0218734741211
1692033	17.7794799804688	89.9013977050781
1692036	16.6128845214844	89.0287551879883
1692039	23.8876037597656	90.0668411254883
1692042	26.305908203125	83.8894577026367
1692045	24.1718139648438	88.3695831298828
1692048	21.1588134765625	94.182014465332
1692051	20.5260620117188	94.6202239990234
1692054	19.9974365234375	97.7214050292969
1692057	19.6740112304688	95.7129440307617
1692060	19.8053588867188	97.3696670532227
1692063	21.8427124023438	92.1048889160156
1692066	25.1574096679688	83.7513580322266
1692069	24.4469604492188	84.0633773803711
1692072	21.001220703125	93.814208984375
1692075	19.5814208984375	96.4971237182617
1692078	19.8567504882812	95.9909896850586
1692081	19.6038818359375	95.7071533203125
1692084	19.4121704101562	95.7205200195312
1692087	22.8995971679688	86.6361541748047
1692090	25.74853515625	79.6469268798828
1692093	25.1586303710938	80.2751083374023
1692096	20.6339721679688	94.436279296875
1692099	19.8019714355469	95.0717620849609
1692102	19.5916442871094	93.5362701416016
1692105	19.5199890136719	92.4489212036133
1692108	19.2954711914062	91.8670654296875
1692111	23.4855346679688	84.7069702148438
1692114	25.6624755859375	80.4194183349609
1692117	23.61962890625	83.0837631225586
1692120	20.134033203125	95.1751480102539
1692123	19.5118408203125	95.2174072265625
1692126	19.4560546875	93.4545669555664
1692129	19.5791015625	94.4145278930664
1692132	19.5003051757812	94.7380752563477
1692135	22.0344543457031	92.3451538085938
1692138	24.9148254394531	83.6814880371094
1692141	23.9398193359375	82.8498001098633
1692144	20.6376342773438	95.5585861206055
1692147	19.096923828125	96.0189208984375
1692150	19.60595703125	95.4025344848633
1692153	19.7156982421875	96.8916625976562
1692156	19.6538696289062	96.978515625
1692159	20.8031616210938	97.0254364013672
1692162	21.4992370605469	97.6468734741211
1692165	22.7149047851562	93.282844543457
1692168	20.7782592773438	97.1152725219727
1692171	20.2544555664062	95.9714508056641
1692174	20.048583984375	96.2246780395508
1692177	20.1278991699219	95.5143203735352
1692180	19.961669921875	93.5275268554688
1692183	24.8831787109375	80.7736358642578
1692186	26.9493103027344	77.3213653564453
1692189	25.541748046875	82.4613647460938
1692192	21.593994140625	97.1570587158203
1692195	20.5214233398438	96.4440460205078
1692198	19.3239440917969	91.8125305175781
1692201	17.7834777832031	91.3272552490234
1692204	16.7277221679688	93.7852172851562
1692207	22.4700317382812	90.1569442749023
1692210	25.0840759277344	82.379997253418
1692213	23.7167358398438	84.2998580932617
1692216	20.1674194335938	95.0602416992188
1692219	19.6384582519531	96.8394622802734
1692222	19.2697448730469	95.2405395507812
1692225	19.4264526367188	96.6695098876953
1692228	19.4481506347656	95.8852691650391
1692231	20.6593017578125	97.9457397460938
1692234	21.7034912109375	93.6736831665039
1692237	22.7660522460938	87.6881790161133
1692240	20.2540893554688	95.3190078735352
1692243	19.900634765625	96.6784744262695
1692246	19.9237670898438	95.7476196289062
1692249	19.6565551757812	96.5514831542969
1692252	19.7470092773438	96.7446670532227
1692255	20.9893188476562	97.5557174682617
1692258	21.7962646484375	96.3202362060547
1692261	21.721435546875	95.6158599853516
1692264	20.26806640625	97.0861968994141
1692267	20.1784057617188	95.8244781494141
1692270	19.9888916015625	95.8380966186523
1692273	19.7689208984375	96.0803756713867
1692276	19.6448364257812	95.1308441162109
1692279	21.3086547851562	95.2454376220703
1692282	23.5355224609375	86.4481658935547
1692285	23.4042358398438	85.5776290893555
1692288	20.7781677246094	91.8584060668945
1692291	20.2803039550781	94.095588684082
1692294	20.0330810546875	93.3182907104492
1692297	20.169921875	88.5114440917969
1692300	20.0967407226562	88.8667755126953
1692303	23.959228515625	79.8467788696289
1692306	26.0123291015625	77.7892379760742
1692309	24.8336486816406	79.1449203491211
1692312	20.5179443359375	92.9839935302734
1692315	19.85400390625	96.9108276367188
1692318	19.8690490722656	96.1348342895508
1692321	19.7936401367188	96.9178466796875
1692324	19.8588256835938	97.1058197021484
1692327	21.5410766601562	97.6028518676758
1692330	23.8594970703125	89.1592483520508
1692333	23.1897583007812	88.3653030395508
1692336	20.5320434570312	96.3812561035156
1692339	20.2521057128906	96.2488327026367
1692342	20.1044311523438	95.7617645263672
1692345	19.8744812011719	95.7743835449219
1692348	19.7780151367188	95.4845199584961
1692351	21.4241638183594	93.6672821044922
1692354	24.1333618164062	84.2451095581055
1692357	24.2377319335938	84.2687454223633
1692360	20.7421264648438	94.0730590820312
1692363	19.8257751464844	96.7224655151367
1692366	19.8923034667969	96.0703353881836
1692369	19.9345092773438	96.5729293823242
1692372	19.8077392578125	95.6943359375
1692375	23.013671875	86.9939422607422
1692378	25.1454467773438	84.7169189453125
1692381	24.321044921875	86.7229843139648
1692384	21.3219604492188	94.6352081298828
1692387	19.8257446289062	96.2466430664062
1692390	18.4832153320312	93.6738433837891
1692393	18.68603515625	95.1755447387695
1692396	19.8217163085938	96.1156005859375
1692399	21.44677734375	97.2386322021484
1692402	23.2991333007812	91.383171081543
1692405	25.1406555175781	86.1730117797852
1692408	21.8421020507812	94.9215850830078
1692411	20.6518859863281	96.7550354003906
1692414	20.6224060058594	95.9021301269531
1692417	20.6372985839844	95.5952987670898
1692420	20.530517578125	97.3710784912109
1692423	21.651123046875	92.6139373779297
1692426	23.9920654296875	84.0170516967773
1692429	23.529296875	87.8116607666016
1692432	21.0898132324219	94.1645431518555
1692435	20.5331420898438	96.2781600952148
1692438	20.0122680664062	95.0829696655273
1692441	19.4781494140625	94.5396270751953
1692444	18.8878784179688	92.0634231567383
1692447	22.4503784179688	80.8912963867188
1692450	23.6986694335938	78.8074340820312
1692453	21.2930603027344	91.9276123046875
1692456	19.792236328125	96.4230346679688
1692459	19.2474975585938	95.3495941162109
1692462	18.522216796875	94.6756210327148
1692465	17.2987670898438	92.3902893066406
1692468	15.847900390625	90.6018829345703
1692471	19.2297973632812	83.6175308227539
1692474	21.3986206054688	83.8624877929688
1692477	21.9686889648438	85.9492645263672
1692480	19.5709228515625	96.5987167358398
1692483	19.4738159179688	94.8784942626953
1692486	19.5640563964844	96.0429992675781
1692489	19.420654296875	96.7721557617188
1692492	19.4626770019531	95.1512069702148
1692495	20.0689086914062	97.1165008544922
1692498	20.9668579101562	95.1972122192383
1692501	21.3641052246094	92.922966003418
1692504	20.4166259765625	96.8573150634766
1692507	20.1283569335938	95.6599349975586
1692510	19.7889099121094	94.210075378418
1692513	19.31591796875	94.4257431030273
1692516	19.0637512207031	94.5465927124023
1692519	21.3018188476562	90.2857055664062
1692522	22.1292724609375	89.5307769775391
1692525	22.2381286621094	91.6121826171875
1692528	20.6251831054688	97.4707412719727
1692531	20.3489685058594	96.7617950439453
1692534	20.0025634765625	96.3050384521484
1692537	19.895751953125	95.0632858276367
1692540	19.936279296875	97.2708282470703
1692543	20.3327026367188	98.3223037719727
1692546	20.8190612792969	98.2115478515625
1692549	21.1045837402344	95.6936645507812
1692552	20.2388000488281	97.4587249755859
1692555	20.0407104492188	95.41455078125
1692558	20.0046691894531	96.8528594970703
1692561	20.0399780273438	97.4211654663086
1692564	19.6621704101562	97.0311584472656
1692567	19.5124206542969	97.7861175537109
1692570	20.4324951171875	96.7505493164062
1692573	20.908935546875	96.3936233520508
1692576	20.1099243164062	95.3944854736328
1692579	19.6874389648438	95.1336975097656
1692582	19.3612060546875	94.1182098388672
1692585	19.2099609375	95.3963317871094
1692588	18.9190673828125	95.7861862182617
1692591	19.9619140625	96.107177734375
1692594	21.8626708984375	92.0647964477539
1692597	22.021240234375	89.499870300293
1692600	20.0879516601562	95.1809234619141
1692603	19.4868774414062	94.2339172363281
1692606	19.2951049804688	93.2917709350586
1692609	19.4262084960938	94.0527648925781
1692612	19.2252807617188	94.4521789550781
1692615	21.9440612792969	91.3552551269531
1692618	24.3442993164062	82.5023727416992
1692621	24.4937744140625	81.6314544677734
1692624	20.8729858398438	90.9001007080078
1692627	19.7388610839844	96.4090347290039
1692630	19.3117065429688	93.4491577148438
1692633	19.4920043945312	92.4105834960938
1692636	19.2919921875	92.4526519775391
1692639	21.9718017578125	88.7473449707031
1692642	24.0067138671875	84.3056411743164
1692645	24.4620056152344	81.2599945068359
1692648	20.7222595214844	92.7078247070312
1692651	19.6187133789062	97.1307678222656
1692654	19.7996215820312	94.7539672851562
1692657	19.8711853027344	97.6022567749023
1692660	19.5430297851562	97.4533920288086
1692663	21.6483764648438	91.5585174560547
1692666	24.4925231933594	80.2864151000977
1692669	25.558349609375	75.2684783935547
1692672	21.0990905761719	87.5997619628906
1692675	19.1710815429688	91.6955337524414
1692678	19.5040588378906	93.1011657714844
1692681	19.24462890625	93.5565032958984
1692684	19.069091796875	94.5182876586914
1692687	20.5936889648438	97.2761154174805
1692690	21.3582458496094	95.7971343994141
1692693	22.900390625	89.163330078125
1692696	20.1831665039062	96.695556640625
1692699	20.1436767578125	96.5251693725586
1692702	19.93310546875	96.1407241821289
1692705	19.672607421875	96.6435699462891
1692708	19.3663940429688	96.8407211303711
1692711	20.6795349121094	95.5442810058594
1692714	21.2979125976562	94.0176849365234
1692717	21.5287780761719	92.9004135131836
1692720	20.0082397460938	95.4920501708984
1692723	19.9124145507812	96.9714736938477
1692726	19.8098754882812	97.3894195556641
1692729	19.42822265625	96.1261367797852
1692732	19.1919555664062	95.4661865234375
1692735	21.834228515625	88.5886001586914
1692738	23.2174987792969	87.0469436645508
1692741	22.5764770507812	87.607780456543
1692744	20.0038452148438	96.1870651245117
1692747	19.773193359375	96.1846008300781
1692750	19.6276550292969	96.1611480712891
1692753	19.4574584960938	95.5265121459961
1692756	19.3858032226562	96.9641571044922
1692759	22.2398071289062	88.9266967773438
1692762	22.9857177734375	89.3582305908203
1692765	24.9954223632812	84.9146728515625
1692768	21.3207397460938	93.14208984375
1692771	19.9780578613281	97.0559310913086
1692774	19.5882873535156	94.2080383300781
1692777	19.8982543945312	95.8090744018555
1692780	19.7833251953125	96.8604507446289
1692783	21.3505859375	95.5936965942383
1692786	24.4598999023438	87.9239196777344
1692789	25.553955078125	79.792724609375
1692792	21.6675720214844	89.3476943969727
1692795	19.5032348632812	90.6450729370117
1692798	18.1661376953125	92.3500442504883
1692801	17.1565246582031	94.7750091552734
1692804	19.0048828125	96.5295257568359
1692807	24.2814025878906	91.1639251708984
1692810	28.1382446289062	81.5822143554688
1692813	26.5829467773438	80.8479385375977
1692816	22.33154296875	92.7351684570312
1692819	20.6581726074219	95.3950805664062
1692822	19.1724548339844	93.2743148803711
1692825	17.59814453125	90.8054962158203
1692828	16.417236328125	92.462272644043
1692831	25.3853759765625	85.2623977661133
1692834	27.92041015625	74.826286315918
1692837	26.7362670898438	75.1767807006836
1692840	21.6112670898438	90.494514465332
1692843	19.7031860351562	95.800910949707
1692846	19.6964111328125	93.0925674438477
1692849	19.48291015625	92.4572677612305
1692852	19.4347534179688	95.0547485351562
1692855	21.7939147949219	92.7533569335938
1692858	22.849365234375	89.7212295532227
1692861	22.9342651367188	87.1748504638672
1692864	20.3839721679688	95.3490371704102
1692867	19.6484985351562	96.1643981933594
1692870	19.7320251464844	96.4004058837891
1692873	19.4547424316406	96.7177124023438
1692876	19.3242797851562	96.1069412231445
1692879	21.3844604492188	94.6749496459961
1692882	24.6875	80.1707077026367
1692885	24.9420166015625	76.8766860961914
1692888	20.9207763671875	91.0862045288086
1692891	19.9035034179688	95.2069320678711
1692894	19.8572387695312	95.4243698120117
1692897	19.5960998535156	95.0700225830078
1692900	19.4382934570312	94.3167724609375
1692903	24.0947875976562	84.2470779418945
1692906	26.5737915039062	76.6782150268555
1692909	25.766357421875	74.9539489746094
1692912	20.839599609375	91.359260559082
1692915	19.4164428710938	94.7548751831055
1692918	20.2073364257812	90.8899154663086
1692921	20.080322265625	88.7941436767578
1692924	19.45703125	91.6852340698242
1692927	23.9412841796875	82.7657623291016
1692930	26.931396484375	74.4325180053711
1692933	26.4124145507812	74.1101608276367
1692936	21.3350219726562	87.9962310791016
1692939	19.0699768066406	90.4987030029297
1692942	18.5905151367188	89.0062103271484
1692945	18.692138671875	90.9638214111328
1692948	19.1893310546875	94.8156890869141
1692951	21.4761657714844	97.7393798828125
1692954	24.6672668457031	83.6289901733398
1692957	25.1876831054688	80.3124465942383
1692960	20.85986328125	91.7619857788086
1692963	19.8743286132812	96.8451690673828
1692966	19.4061584472656	94.5305557250977
1692969	19.1777038574219	94.0390701293945
1692972	19.1370239257812	95.5478363037109
1692975	21.2883911132812	97.8845825195312
1692978	22.9121398925781	88.3394470214844
1692981	24.3498229980469	81.3915939331055
1692984	20.550048828125	90.6156539916992
1692987	19.7479248046875	96.901741027832
1692990	19.6968994140625	96.2533721923828
1692993	19.7352294921875	96.0303039550781
1692996	19.5675964355469	97.3159637451172
1692999	20.6821594238281	98.7168807983398
1693002	21.2091369628906	97.4209899902344
1693005	20.978271484375	92.5609970092773
1693008	19.664794921875	95.4390640258789
1693011	19.1482849121094	96.2136001586914
1693014	18.9774169921875	95.7204666137695
1693017	18.8399963378906	96.4881210327148
1693020	18.4573059082031	94.0751495361328
1693023	21.2275390625	89.5167388916016
1693026	23.0882873535156	84.5700378417969
1693029	23.75439453125	81.904182434082
1693032	20.02099609375	92.3324127197266
1693035	18.5693054199219	96.9587631225586
1693038	17.9102783203125	92.8756790161133
1693041	18.7445068359375	92.0245895385742
1693044	19.2941589355469	90.8335952758789
1693047	23.6803283691406	82.8677444458008
1693050	26.6550903320312	75.4513626098633
1693053	25.8326110839844	75.362548828125
1693056	20.8907470703125	89.8921966552734
1693059	19.0065612792969	95.9735870361328
1693062	17.8598022460938	94.5323333740234
1693065	18.4439086914062	94.3003921508789
1693068	18.7255249023438	94.1080856323242
1693071	24.8288879394531	82.5193557739258
1693074	27.8804626464844	73.8362121582031
1693077	27.5930786132812	72.8165740966797
1693080	22.610107421875	89.3918991088867
1693083	20.9754333496094	96.9336013793945
1693086	20.6759643554688	96.8148422241211
1693089	19.5994873046875	93.5581436157227
1693092	18.2923278808594	91.9150924682617
1693095	26.00341796875	82.1137008666992
1693098	28.8459777832031	71.1798858642578
1693101	27.9996337890625	73.2400054931641
1693104	22.59716796875	90.3457489013672
1693107	20.0491027832031	95.0190048217773
1693110	18.2562866210938	88.9359664916992
1693113	17.1427917480469	88.7560653686523
1693116	15.0199890136719	87.3646774291992
1693119	24.2713317871094	85.5182800292969
1693122	26.8183288574219	76.6580810546875
1693125	26.3978881835938	78.5757217407227
1693128	21.2136840820312	92.9525604248047
1693131	19.93505859375	95.0074234008789
1693134	19.8890686035156	94.5382461547852
1693137	19.4170532226562	93.6335601806641
1693140	18.9943542480469	93.3936920166016
1693143	24.210693359375	80.8254470825195
1693146	27.2144470214844	74.6767578125
1693149	26.1034545898438	75.368522644043
1693152	21.0716552734375	90.3393173217773
1693155	19.0251770019531	94.5530395507812
1693158	17.6475219726562	93.5750961303711
1693161	18.3454284667969	91.5851898193359
1693164	19.0125122070312	93.8345565795898
1693167	24.1480102539062	84.3632507324219
1693170	27.3932495117188	76.8474044799805
1693173	25.684326171875	76.7198257446289
1693176	21.0545654296875	90.4106597900391
1693179	18.9523315429688	96.0166549682617
1693182	17.5611267089844	92.2470550537109
1693185	18.6373291015625	92.966796875
1693188	19.1430358886719	97.145751953125
1693191	24.4583129882812	80.3934860229492
1693194	26.334716796875	76.9833297729492
1693197	25.5857543945312	75.811637878418
1693200	20.7188415527344	91.3740081787109
1693203	19.2062377929688	96.9517364501953
1693206	19.1448974609375	92.6168518066406
1693209	19.7568969726562	91.1510772705078
1693212	19.4930114746094	92.2521209716797
1693215	21.6673583984375	87.7604675292969
1693218	23.4403076171875	86.4867095947266
1693221	22.9891357421875	85.4850845336914
1693224	20.6383972167969	89.7446441650391
1693227	19.0757751464844	93.8677215576172
1693230	18.9785766601562	90.6864395141602
1693233	18.9635925292969	88.3108825683594
1693236	17.9230346679688	88.562141418457
1693239	22.484375	81.1082763671875
1693242	24.2278137207031	76.9841156005859
1693245	25.0908203125	75.5811233520508
1693248	20.8247680664062	85.7396087646484
1693251	17.9744567871094	88.0811767578125
1693254	16.7450561523438	86.241340637207
1693257	16.4098510742188	88.3269958496094
1693260	15.1970825195312	89.5463333129883
1693263	24.156005859375	84.2929077148438
1693266	27.18310546875	73.2549285888672
1693269	26.6729736328125	72.4766311645508
1693272	21.5042724609375	88.5699844360352
1693275	19.4100341796875	96.6807022094727
1693278	17.9369506835938	93.4444122314453
1693281	18.2208862304688	93.6322555541992
1693284	17.5840759277344	97.4769744873047
1693287	24.7144775390625	83.5041732788086
1693290	27.6129150390625	70.9949264526367
1693293	26.6250610351562	70.7194747924805
1693296	21.3385620117188	86.0795516967773
1693299	19.0816345214844	94.3303833007812
1693302	17.9058227539062	90.5753784179688
1693305	17.0602111816406	89.4504318237305
1693308	16.3665161132812	86.9885635375977
1693311	24.5574951171875	80.8116760253906
1693314	27.778564453125	69.8020782470703
1693317	26.8435363769531	69.3984680175781
1693320	21.2719116210938	88.2184600830078
1693323	18.694580078125	95.167236328125
1693326	16.7232055664062	94.3032913208008
1693329	16.8986206054688	88.1378631591797
1693332	17.96337890625	86.7158050537109
1693335	22.8596496582031	81.8539581298828
1693338	26.0291137695312	74.7074966430664
1693341	26.1303405761719	76.0363006591797
1693344	21.0906372070312	90.088493347168
1693347	19.8502197265625	96.4767227172852
1693350	19.8994445800781	94.3290939331055
1693353	19.4443359375	93.1485214233398
1693356	18.7482299804688	91.6172180175781
1693359	24.2484741210938	82.920654296875
1693362	26.6041870117188	77.1998596191406
1693365	24.8510437011719	78.5387954711914
1693368	20.9848327636719	90.0253982543945
1693371	18.9985961914062	96.83837890625
1693374	18.8362426757812	97.1117248535156
1693377	19.6561279296875	95.7145462036133
1693380	19.0534057617188	92.9019012451172
1693383	24.9556274414062	82.6443099975586
1693386	27.3226623535156	75.1256942749023
1693389	26.125732421875	76.3244400024414
1693392	21.2838745117188	89.4936218261719
1693395	19.7896118164062	94.7949295043945
1693398	19.5780029296875	89.6830291748047
1693401	19.505859375	89.0592575073242
1693404	19.7723388671875	86.6394195556641
1693407	23.2872924804688	81.182861328125
1693410	24.9517211914062	78.5134429931641
1693413	25.2666625976562	78.8797149658203
1693416	21.2649536132812	94.2607574462891
1693419	20.4249267578125	97.2579345703125
1693422	20.0237731933594	94.7662963867188
1693425	19.6006164550781	94.8950958251953
1693428	19.7127075195312	96.5389175415039
1693431	20.7149658203125	96.7370300292969
1693434	23.3430786132812	87.5087966918945
1693437	24.7327880859375	81.5578918457031
1693440	21.1047668457031	91.0609741210938
1693443	19.7151489257812	94.2244338989258
1693446	20.3502197265625	90.0832061767578
1693449	20.1037902832031	88.0192108154297
1693452	19.657958984375	91.3588943481445
1693455	23.19482421875	82.753288269043
1693458	26.6748657226562	74.8730163574219
1693461	25.9096069335938	75.0399475097656
1693464	21.1897277832031	88.6860733032227
1693467	19.6829223632812	95.2045593261719
1693470	19.97412109375	93.1907653808594
1693473	19.9178161621094	93.7329635620117
1693476	19.8121948242188	94.4379272460938
1693479	21.2184448242188	96.2994613647461
1693482	22.8683471679688	91.4994888305664
1693485	23.2144775390625	88.1154937744141
1693488	21.1709594726562	94.7115325927734
1693491	20.5830383300781	96.9895782470703
1693494	20.478759765625	95.7666320800781
1693497	20.8049621582031	95.5717163085938
1693500	20.6416320800781	94.4101867675781
1693503	24.0387268066406	93.1459274291992
1693506	27.4930419921875	83.5525741577148
1693509	28.7352294921875	79.2737655639648
1693512	23.7300720214844	94.1389846801758
1693515	22.4547119140625	94.4705200195312
1693518	20.5964965820312	90.5883560180664
1693521	20.4072570800781	89.9012603759766
1693524	19.5925598144531	91.1422271728516
1693527	25.5975341796875	90.3760070800781
1693530	30.5267028808594	77.0615234375
1693533	29.2923889160156	77.8952865600586
1693536	23.17724609375	95.2333831787109
1693539	20.9739379882812	96.4769973754883
1693542	18.9515686035156	94.5899505615234
1693545	17.3651733398438	87.5148544311523
1693548	17.1192626953125	89.0511016845703
1693551	18.2545166015625	95.6750793457031
1693554	19.5766906738281	98.0841293334961
1693557	19.6137390136719	98.2344436645508
1693560	19.3922119140625	95.8930282592773
1693563	19.3133544921875	95.9793090820312
1693566	19.0879821777344	96.5827331542969
1693569	18.966796875	96.3072738647461
1693572	18.9760131835938	96.8574676513672
1693575	19.2835083007812	97.4676971435547
1693578	20.5870361328125	98.2795867919922
1693581	20.7515869140625	97.7537078857422
1693584	20.7161560058594	97.9866027832031
1693587	20.9159545898438	97.4178009033203
1693590	21.0542602539062	96.8397979736328
1693593	20.7670288085938	96.1843414306641
1693596	20.604248046875	94.8927993774414
1693599	21.9632263183594	95.1412582397461
1693602	26.9903259277344	81.4161148071289
1693605	26.9475708007812	79.9806594848633
1693608	22.2835693359375	93.9489517211914
1693611	20.7413635253906	95.9079055786133
1693614	20.2638549804688	95.2086563110352
1693617	20.6186218261719	96.1052551269531
1693620	20.6374206542969	96.192985534668
1693623	24.0939331054688	88.2929534912109
1693626	28.3235168457031	77.3129730224609
1693629	27.5986022949219	76.9969635009766
1693632	22.9476928710938	88.3845291137695
1693635	20.6290283203125	94.6623077392578
1693638	19.0311889648438	93.4878158569336
1693641	17.7328491210938	93.3412551879883
1693644	17.2475280761719	91.7138519287109
1693647	24.7598266601562	84.2255783081055
1693650	26.3194885253906	81.197509765625
1693653	25.3797607421875	86.0860900878906
1693656	21.1723937988281	94.6888198852539
1693659	20.6416625976562	93.724609375
1693662	19.3228149414062	93.7049942016602
1693665	19.5790710449219	93.5938873291016
1693668	19.4429321289062	96.512580871582
1693671	19.7953491210938	95.3881988525391
1693674	21.5802917480469	93.4099502563477
1693677	21.6129760742188	92.6121673583984
1693680	20.1864624023438	97.1674270629883
1693683	20.2507934570312	96.6586761474609
1693686	20.219482421875	97.2565002441406
1693689	20.0599670410156	97.0851516723633
1693692	19.9803466796875	96.741096496582
1693695	21.4057922363281	98.5478363037109
1693698	24.3460998535156	86.2665176391602
1693701	24.7625732421875	83.1826553344727
1693704	21.3832397460938	91.5333709716797
1693707	20.489501953125	97.6283874511719
1693710	20.4838562011719	96.0390167236328
1693713	20.1630859375	97.017822265625
1693716	19.9676513671875	97.0764770507812
1693719	20.7326049804688	97.6705627441406
1693722	21.9647521972656	93.2461090087891
1693725	23.4919738769531	85.3496322631836
1693728	20.7114562988281	93.4839706420898
1693731	19.6914672851562	96.8851623535156
1693734	19.4927368164062	94.2735443115234
1693737	19.5399475097656	93.8038711547852
1693740	19.3002624511719	95.3868408203125
1693743	23.8851013183594	83.4101257324219
1693746	27.1091918945312	75.3813171386719
1693749	26.1702880859375	74.5026397705078
1693752	21.3314208984375	91.6450653076172
1693755	20.03369140625	96.6365585327148
1693758	20.3504638671875	96.1630554199219
1693761	20.1168518066406	94.5657501220703
1693764	19.9329223632812	95.5465393066406
1693767	21.7349243164062	94.7849884033203
1693770	25.6380004882812	83.4045104980469
1693773	25.2327270507812	82.9928894042969
1693776	21.43994140625	92.3877182006836
1693779	19.806396484375	97.4645233154297
1693782	19.8332214355469	94.0987854003906
1693785	19.9240112304688	91.9883422851562
1693788	19.5924987792969	94.8831253051758
1693791	23.2796020507812	85.1329040527344
1693794	27.1016540527344	76.615234375
1693797	26.1390380859375	76.0920639038086
1693800	21.22021484375	89.8613739013672
1693803	19.0867309570312	95.6683197021484
1693806	17.4135131835938	93.9743423461914
1693809	16.5089721679688	93.8095626831055
1693812	17.9261474609375	94.9545745849609
1693815	24.1207885742188	88.4039688110352
1693818	28.4521789550781	76.0222244262695
1693821	27.2377319335938	74.4036407470703
1693824	21.8331298828125	90.3404083251953
1693827	19.4674987792969	96.6428833007812
1693830	18.1130981445312	95.0436172485352
1693833	18.6069946289062	94.6797714233398
1693836	19.419189453125	93.9599533081055
1693839	25.0387268066406	85.5659713745117
1693842	28.4708862304688	77.2083206176758
1693845	27.0213012695312	78.0323104858398
1693848	21.8603515625	92.4131240844727
1693851	19.91943359375	96.687141418457
1693854	18.5579833984375	96.286247253418
1693857	19.0972900390625	96.9621734619141
1693860	19.7094116210938	95.4445877075195
1693863	25.4368286132812	84.5490570068359
1693866	28.123779296875	78.5764770507812
1693869	27.1477661132812	79.3740310668945
1693872	21.9827880859375	93.6210174560547
1693875	20.1687622070312	96.3077239990234
1693878	20.2786254882812	94.7413940429688
1693881	20.4791259765625	92.5773468017578
1693884	19.7574768066406	92.7219848632812
1693887	26.23876953125	81.5994644165039
1693890	28.8809814453125	76.0617294311523
1693893	27.1874389648438	81.0107269287109
1693896	22.03466796875	93.31591796875
1693899	20.6722412109375	96.9414138793945
1693902	20.1990966796875	96.1043014526367
1693905	20.3414306640625	96.8085250854492
1693908	20.2657470703125	96.0748062133789
1693911	23.5698852539062	89.3097305297852
1693914	25.0681762695312	84.8174285888672
1693917	24.8875732421875	82.4933319091797
1693920	21.7848815917969	90.8518676757812
1693923	20.124267578125	97.1964416503906
1693926	19.0086669921875	94.7638473510742
1693929	19.643798828125	94.4655151367188
1693932	20.3628540039062	96.2324981689453
1693935	24.0787963867188	86.7457962036133
1693938	27.5419311523438	80.0171661376953
1693941	26.5723876953125	78.1304092407227
1693944	21.8987426757812	89.5415420532227
1693947	19.8257446289062	93.3020935058594
1693950	18.9850463867188	94.0171508789062
1693953	18.3279418945312	92.7570343017578
1693956	18.4707641601562	92.9843444824219
1693959	24.9349975585938	87.9720993041992
1693962	28.6980285644531	75.8369903564453
1693965	27.5827026367188	75.8701324462891
1693968	22.5158081054688	90.3933944702148
1693971	20.463623046875	94.4267196655273
1693974	19.2759094238281	93.3701019287109
1693977	18.6517944335938	93.7464752197266
1693980	18.8739318847656	93.7756423950195
1693983	26.0011596679688	86.0694732666016
1693986	28.9546813964844	76.6694793701172
1693989	27.4409790039062	77.5806579589844
1693992	22.2734375	90.7651748657227
1693995	20.4832153320312	97.0728912353516
1693998	19.281494140625	95.655632019043
1694001	19.7684936523438	94.818473815918
1694004	20.4241943359375	91.8069076538086
1694007	24.427490234375	81.6418991088867
1694010	27.3222351074219	74.5066375732422
1694013	27.0626525878906	74.8839111328125
1694016	21.83544921875	92.0355758666992
1694019	20.42724609375	95.7246704101562
1694022	20.3739624023438	95.5970230102539
1694025	20.5149841308594	96.4604263305664
1694028	20.3446044921875	95.4236450195312
1694031	24.4478759765625	83.3837966918945
1694034	27.8911743164062	77.3096466064453
1694037	26.5629272460938	79.2727432250977
1694040	21.8106079101562	93.512580871582
1694043	20.6363525390625	96.4598541259766
1694046	20.4834899902344	94.5111541748047
1694049	20.34765625	92.9014892578125
1694052	20.1900329589844	93.1406402587891
1694055	24.2228393554688	83.5176391601562
1694058	26.9144287109375	77.5812835693359
1694061	26.1331176757812	78.1874237060547
1694064	21.7752990722656	91.1296920776367
1694067	20.0996704101562	97.5392227172852
1694070	20.0604248046875	95.2829284667969
1694073	20.6446533203125	94.2454986572266
1694076	20.4476013183594	96.1359558105469
1694079	21.9667358398438	94.6405334472656
1694082	25.7257690429688	83.6144027709961
1694085	26.8145141601562	76.7872924804688
1694088	21.6262817382812	90.4185562133789
1694091	19.462890625	92.7533264160156
1694094	19.9864501953125	96.2297134399414
1694097	19.7760314941406	94.3309860229492
1694100	19.3920288085938	93.1925048828125
1694103	22.8402099609375	87.4467620849609
1694106	27.3641662597656	76.4541473388672
1694109	26.5210571289062	76.5394821166992
1694112	21.4310913085938	91.9935836791992
1694115	19.6215209960938	96.5881042480469
1694118	19.497802734375	95.6384963989258
1694121	20.2039184570312	94.1925201416016
1694124	20.253662109375	93.6316680908203
1694127	23.5295104980469	88.2993774414062
1694130	25.6112976074219	82.344856262207
1694133	26.359375	79.6286392211914
1694136	21.9573669433594	89.0988082885742
1694139	19.896728515625	93.5397033691406
1694142	18.4323120117188	93.3793869018555
1694145	17.142822265625	94.2926177978516
1694148	18.3336791992188	94.4950180053711
1694151	26.0133056640625	84.3625564575195
1694154	29.3524169921875	72.705696105957
1694157	28.1285705566406	75.9455642700195
1694160	22.975341796875	89.2732009887695
1694163	20.7895812988281	92.9299926757812
1694166	19.1595764160156	90.0646133422852
1694169	18.001953125	90.8367919921875
1694172	17.539306640625	93.7900543212891
1694175	26.8951721191406	84.8930740356445
1694178	29.5517272949219	72.787353515625
1694181	28.9534301757812	72.9284286499023
1694184	23.5317993164062	86.3043060302734
1694187	20.5191040039062	91.0232238769531
1694190	18.8563842773438	86.5285873413086
1694193	18.6458129882812	83.1226959228516
1694196	17.4535522460938	83.3195495605469
1694199	26.1097412109375	79.6664123535156
1694202	28.992431640625	76.3484497070312
1694205	26.1502380371094	85.6244583129883
1694208	22.3163452148438	96.1491394042969
1694211	21.5940551757812	96.7831115722656
1694214	21.4190673828125	96.9817428588867
1694217	20.8472290039062	96.6084442138672
1694220	20.3627319335938	93.2488021850586
1694223	25.6502990722656	82.7802276611328
1694226	28.5471496582031	78.3581390380859
1694229	26.7373046875	81.5113220214844
1694232	21.9728088378906	93.8716812133789
1694235	20.8748168945312	96.1142120361328
1694238	21.0469970703125	96.6149291992188
1694241	21.0560913085938	97.1901168823242
1694244	21.0408325195312	96.8962020874023
1694247	22.3632202148438	96.6386108398438
1694250	27.0794677734375	81.4407119750977
1694253	26.8406372070312	80.613410949707
1694256	22.5302734375	92.2496337890625
1694259	20.4912719726562	95.4088821411133
1694262	18.9964599609375	94.3020706176758
1694265	18.9301147460938	94.9628372192383
1694268	18.8058166503906	92.5526504516602
1694271	27.1361389160156	82.7608184814453
1694274	29.5526428222656	74.664909362793
1694277	28.5151062011719	77.7755279541016
1694280	23.3922729492188	92.4065856933594
1694283	21.4456481933594	97.2342681884766
1694286	20.0142211914062	93.9140701293945
1694289	18.5615539550781	91.6092834472656
1694292	18.2575073242188	91.0000076293945
1694295	26.9302368164062	81.8449096679688
1694298	29.5780944824219	73.6087265014648
1694301	28.3309326171875	79.2645416259766
1694304	23.5639953613281	90.8410186767578
1694307	21.5879516601562	93.9882583618164
1694310	19.850341796875	89.8045654296875
1694313	18.5205688476562	88.556770324707
1694316	18.1034545898438	90.0164642333984
1694319	27.3692932128906	79.1402130126953
1694322	30.4817810058594	69.6594772338867
1694325	29.5082397460938	76.2697982788086
1694328	24.3450317382812	92.9580078125
1694331	22.8710632324219	96.1690216064453
1694334	22.1260986328125	94.6650314331055
1694337	21.6996459960938	94.0674743652344
1694340	21.4773864746094	90.477180480957
1694343	27.1381225585938	82.8452224731445
1694346	30.907958984375	74.7541961669922
1694349	29.7343444824219	79.6543426513672
1694352	24.4651489257812	94.8386306762695
1694355	22.8135986328125	97.7129058837891
1694358	21.9345092773438	97.6487121582031
1694361	21.5736694335938	92.4758987426758
1694364	20.6942749023438	93.3441619873047
1694367	27.4765014648438	80.8565444946289
1694370	29.4425964355469	81.1316452026367
1694373	26.9959716796875	87.6609802246094
1694376	23.1983032226562	97.1038360595703
1694379	22.8885498046875	97.6476898193359
1694382	22.4299621582031	97.4495162963867
1694385	21.8577880859375	97.5975036621094
1694388	21.9053955078125	97.2196884155273
1694391	26.3908081054688	84.016975402832
1694394	28.2649230957031	78.5109710693359
1694397	28.089111328125	79.5577621459961
1694400	23.5421752929688	91.311653137207
1694403	22.0267333984375	96.6042556762695
1694406	21.5042114257812	96.4628677368164
1694409	20.9784545898438	95.527229309082
1694412	20.9120483398438	94.2786407470703
1694415	26.2674865722656	85.3329849243164
1694418	29.049560546875	76.9141159057617
1694421	27.3602905273438	78.4995040893555
1694424	22.5772705078125	91.3803253173828
1694427	21.3319702148438	97.3461227416992
1694430	21.0278930664062	95.2835311889648
1694433	21.0263977050781	94.6716766357422
1694436	20.8800659179688	94.7055740356445
1694439	26.4314270019531	81.9316558837891
1694442	29.0069580078125	75.3075180053711
1694445	27.5450439453125	77.4542922973633
1694448	23.0637817382812	90.6279602050781
1694451	21.3242492675781	96.8476104736328
1694454	19.5675659179688	95.1146850585938
1694457	18.1865844726562	90.8309631347656
1694460	17.8869934082031	91.6382446289062
1694463	26.6251525878906	83.9827728271484
1694466	29.3068237304688	75.6292724609375
1694469	27.7462158203125	77.7496490478516
1694472	23.5026550292969	91.0043487548828
1694475	21.687255859375	97.26806640625
1694478	21.5867919921875	96.7922592163086
1694481	21.4764404296875	97.6205978393555
1694484	21.355224609375	97.869384765625
1694487	22.2545471191406	97.5283889770508
1694490	22.68701171875	96.2873840332031
1694493	23.3636474609375	94.0704040527344
1694496	21.4300537109375	96.6013946533203
1694499	21.3796997070312	96.8239517211914
1694502	20.9931640625	96.8690719604492
1694505	20.5659790039062	96.5778274536133
1694508	20.2418823242188	95.2610702514648
1694511	20.8165283203125	98.1189498901367
1694514	22.074951171875	93.5116271972656
1694517	22.9368286132812	93.0639724731445
1694520	21.135009765625	96.9842834472656
1694523	20.9927978515625	97.4802169799805
1694526	20.8433227539062	97.3598861694336
1694529	20.646484375	97.2314758300781
1694532	20.7395935058594	96.7656631469727
1694535	22.512451171875	94.9923095703125
1694538	25.9797973632812	84.9639129638672
1694541	26.2843627929688	84.102897644043
1694544	22.4913330078125	94.5551300048828
1694547	21.0662841796875	97.718994140625
1694550	21.3211669921875	96.9120788574219
1694553	21.4546508789062	97.7035675048828
1694556	21.5903930664062	97.3357849121094
1694559	22.5776672363281	98.9405822753906
1694562	23.2828369140625	94.9004669189453
1694565	26.1365051269531	85.9895477294922
1694568	22.5198974609375	97.4761276245117
1694571	21.8431701660156	98.2785339355469
1694574	21.6358337402344	96.936279296875
1694577	21.3568115234375	97.6267776489258
1694580	21.5048828125	97.5687713623047
1694583	22.1285400390625	98.728759765625
1694586	22.5690307617188	96.4887390136719
1694589	25.1259460449219	85.5335235595703
1694592	22.1558227539062	92.1279754638672
1694595	20.5348815917969	95.1201553344727
1694598	19.1285095214844	93.3057861328125
1694601	17.6856384277344	92.0427474975586
1694604	18.5226440429688	93.4971313476562
1694607	25.81103515625	83.5226745605469
1694610	28.6957702636719	76.6930618286133
1694613	27.455322265625	80.4149627685547
1694616	22.5953063964844	92.5729141235352
1694619	21.2363891601562	96.229362487793
1694622	21.2523193359375	97.1250610351562
1694625	21.2091064453125	96.9848327636719
1694628	21.2138977050781	97.5630798339844
1694631	23.9627685546875	88.6405639648438
1694634	28.08984375	80.1589584350586
1694637	27.5517578125	81.3052749633789
1694640	22.6915283203125	92.8692932128906
1694643	20.9093017578125	96.1585540771484
1694646	21.1588134765625	96.8344573974609
1694649	20.9407958984375	96.8590316772461
1694652	20.8901977539062	97.4262084960938
1694655	23.6234130859375	88.8725051879883
1694658	26.5129089355469	83.9465942382812
1694661	27.3544921875	83.1412811279297
1694664	22.3939819335938	93.9336624145508
1694667	21.4299926757812	96.5957794189453
1694670	21.2504272460938	96.4939727783203
1694673	21.03955078125	97.4686584472656
1694676	20.9986877441406	97.3792877197266
1694679	21.7902221679688	95.9798126220703
1694682	24.2693786621094	90.9157638549805
1694685	25.2060546875	87.4874877929688
1694688	21.8329467773438	95.1198425292969
1694691	20.5130004882812	96.7056427001953
1694694	20.2399597167969	95.7370834350586
1694697	20.9384765625	96.8557891845703
1694700	21.2449035644531	96.8560333251953
1694703	22.952392578125	96.4023361206055
1694706	25.5374755859375	88.7540664672852
1694709	27.2752685546875	84.412483215332
1694712	23.0794677734375	92.9034042358398
1694715	22.1746215820312	95.9672393798828
1694718	21.5008239746094	97.7008743286133
1694721	20.9144897460938	92.3337707519531
1694724	20.2298278808594	88.0809936523438
1694727	27.8316650390625	79.0458526611328
1694730	29.2854614257812	78.9266510009766
1694733	27.2735595703125	81.3630523681641
1694736	23.5096130371094	97.7081680297852
1694739	22.3233032226562	96.7514190673828
1694742	20.5616455078125	93.4011306762695
1694745	19.2660217285156	89.8201675415039
1694748	19.1297607421875	92.603759765625
1694751	27.0750122070312	84.9596176147461
1694754	29.9663696289062	77.6385116577148
1694757	27.9383544921875	83.3052368164062
1694760	23.8917541503906	91.1305847167969
1694763	22.6212158203125	97.5285339355469
1694766	21.6457214355469	97.0168762207031
1694769	21.3596801757812	96.2204284667969
1694772	21.5906066894531	97.1577987670898
1694775	25.084716796875	89.3499145507812
1694778	27.7335815429688	83.4183883666992
1694781	26.1480102539062	84.5880584716797
1694784	22.6455078125	94.4771881103516
1694787	21.6742553710938	96.3808975219727
1694790	20.9057312011719	96.0234375
1694793	19.8673400878906	94.3166275024414
1694796	20.6757202148438	94.8517150878906
1694799	26.1366577148438	84.9588928222656
1694802	29.258544921875	77.067008972168
1694805	28.4266357421875	75.348876953125
1694808	23.6366577148438	90.2495040893555
1694811	21.5938720703125	96.5833892822266
1694814	20.3723449707031	95.5875778198242
1694817	20.5405883789062	92.0115432739258
1694820	21.3111267089844	94.1951446533203
1694823	25.73681640625	83.5430908203125
1694826	28.5785522460938	76.844841003418
1694829	27.5215454101562	76.5345764160156
1694832	23.0003051757812	89.8279113769531
1694835	21.1054077148438	97.070182800293
1694838	21.1587829589844	97.1607360839844
1694841	21.362548828125	94.484748840332
1694844	21.4974365234375	94.3834381103516
1694847	26.1154174804688	83.3878860473633
1694850	28.8886108398438	77.7067565917969
1694853	27.8270568847656	78.8922882080078
1694856	23.1384582519531	91.8763275146484
1694859	21.4200744628906	95.9000625610352
1694862	20.5904235839844	95.1381378173828
1694865	20.6500549316406	94.7095565795898
1694868	21.4986877441406	96.3305053710938
1694871	26.138671875	85.8318786621094
1694874	28.7162170410156	79.4149475097656
1694877	27.4872436523438	81.7917175292969
1694880	23.1072387695312	97.4833374023438
1694883	22.2518920898438	97.9815979003906
1694886	21.79248046875	98.1483993530273
1694889	21.3855590820312	96.7020111083984
1694892	20.7022094726562	92.9378890991211
1694895	27.5435791015625	80.7807922363281
1694898	29.4669799804688	81.0269165039062
1694901	25.9818420410156	87.9593658447266
1694904	23.5709533691406	97.3605499267578
1694907	22.8782043457031	98.9134674072266
1694910	22.2577514648438	98.9090957641602
1694913	21.6859130859375	97.2411956787109
1694916	21.5642700195312	96.8765716552734
1694919	26.74755859375	85.8014297485352
1694922	28.61083984375	82.427619934082
1694925	26.0855712890625	88.2463684082031
1694928	23.2684326171875	98.3426513671875
1694931	22.8060302734375	98.7360687255859
1694934	22.2957153320312	98.7355041503906
1694937	22.0236206054688	97.5268630981445
1694940	21.8458862304688	98.4819488525391
1694943	27.147705078125	86.9759063720703
1694946	28.7691650390625	82.077766418457
1694949	25.273193359375	91.5153274536133
1694952	23.2264709472656	97.3501510620117
1694955	22.7380981445312	97.9511947631836
1694958	22.3746643066406	98.4216842651367
1694961	22.165283203125	97.1085510253906
1694964	21.856689453125	98.5080642700195
1694967	24.7662353515625	89.0409088134766
1694970	29.3755493164062	78.4451599121094
1694973	26.760009765625	81.8207244873047
1694976	23.6673583984375	98.3568496704102
1694979	22.6349182128906	98.5708770751953
1694982	22.1121826171875	98.6710510253906
1694985	21.4840087890625	97.9971160888672
1694988	21.3302001953125	92.3121871948242
1694991	28.013916015625	77.4429550170898
1694994	30.401123046875	70.6113128662109
1694997	28.4423522949219	78.0815277099609
1695000	23.9888305664062	97.9126892089844
1695003	22.89990234375	98.3835983276367
1695006	22.2298278808594	98.5431976318359
1695009	21.1201782226562	94.7633743286133
1695012	20.5360717773438	88.1044464111328
1695015	27.6507263183594	80.0239410400391
1695018	29.66796875	78.3417816162109
1695021	28.1331176757812	82.5796508789062
1695024	24.2857360839844	93.6789093017578
1695027	22.991455078125	97.9790649414062
1695030	22.310791015625	98.631591796875
1695033	21.912841796875	98.2437133789062
1695036	21.8529663085938	97.578498840332
1695039	23.9702758789062	92.3521041870117
1695042	28.7200927734375	82.6083984375
1695045	28.2207641601562	83.187873840332
1695048	23.9474487304688	95.2855072021484
1695051	22.92626953125	97.0763092041016
1695054	22.4366455078125	98.4706497192383
1695057	22.1393432617188	97.9512252807617
1695060	22.2449951171875	97.3246841430664
1695063	24.0311279296875	95.7547912597656
1695066	26.8256225585938	86.9116287231445
1695069	26.732177734375	86.7806167602539
1695072	23.54541015625	94.8232192993164
1695075	22.3730163574219	97.4906921386719
1695078	21.6981811523438	96.279426574707
1695081	21.4023132324219	93.5509948730469
1695084	21.787353515625	96.9823532104492
1695087	24.9697265625	91.423713684082
1695090	28.41650390625	84.4033203125
1695093	26.4432678222656	84.9297943115234
1695096	24.0220336914062	93.2246475219727
1695099	22.8999633789062	98.547492980957
1695102	22.3392944335938	97.7850189208984
1695105	21.7677001953125	94.3974609375
1695108	21.9069213867188	90.3924407958984
1695111	28.0323181152344	76.4111022949219
1695114	30.3726806640625	72.8318710327148
1695117	27.4761657714844	81.875846862793
1695120	24.0882568359375	98.542724609375
1695123	23.0621948242188	98.1112518310547
1695126	22.234130859375	95.2229309082031
1695129	21.1656799316406	92.1482086181641
1695132	20.6816101074219	89.2500305175781
1695135	28.1170349121094	73.2845458984375
1695138	31.419677734375	67.6838989257812
1695141	27.2508850097656	86.1422882080078
1695144	24.1358947753906	97.9770965576172
1695147	22.812255859375	95.208122253418
1695150	21.6825256347656	91.7250747680664
1695153	20.6025390625	89.8963470458984
1695156	20.5713806152344	91.6901168823242
1695159	27.9594116210938	74.9309005737305
1695162	31.4049072265625	67.97607421875
1695165	29.737548828125	72.1597366333008
1695168	24.8373413085938	96.7007598876953
1695171	23.492431640625	97.8498382568359
1695174	22.6451110839844	94.2082977294922
1695177	21.4612426757812	92.9092330932617
1695180	21.264892578125	91.1397094726562
1695183	26.6505126953125	83.4259948730469
1695186	29.3815307617188	81.0703277587891
1695189	26.8063659667969	86.0359039306641
1695192	23.7120361328125	98.4697036743164
1695195	23.0130615234375	98.4320755004883
1695198	22.4710693359375	97.2161560058594
1695201	21.81103515625	96.4043884277344
1695204	21.3700561523438	95.1426239013672
1695207	27.3756103515625	82.8537445068359
1695210	28.1306457519531	82.0639953613281
1695213	25.8753967285156	86.8193206787109
1695216	23.1541748046875	97.7583618164062
1695219	22.31396484375	97.9281387329102
1695222	21.8132934570312	97.8976745605469
1695225	21.4119262695312	97.1997909545898
1695228	21.4283142089844	96.3523101806641
1695231	25.1373291015625	88.9908599853516
1695234	28.2686157226562	82.4686737060547
1695237	25.6981201171875	87.453010559082
1695240	23.3025207519531	97.0182952880859
1695243	22.60986328125	97.2637634277344
1695246	22.2318115234375	98.3089904785156
1695249	21.8831481933594	97.9674530029297
1695252	21.7134399414062	97.6037902832031
1695255	27.3261108398438	83.2954406738281
1695258	28.2548217773438	80.0611801147461
1695261	26.4819641113281	83.8814392089844
1695264	23.4346313476562	98.3171844482422
1695267	22.3365478515625	98.4206695556641
1695270	21.7433471679688	98.5181350708008
1695273	21.2350463867188	96.2048645019531
1695276	20.62744140625	89.5026473999023
1695279	27.2472534179688	80.2495651245117
1695282	27.2324829101562	82.0663223266602
1695285	24.5711059570312	89.1888427734375
1695288	22.7081909179688	98.2164916992188
1695291	21.5228271484375	94.9347152709961
1695294	20.7070922851562	91.5579986572266
1695297	19.6617126464844	89.5189819335938
1695300	19.426513671875	85.2146911621094
1695303	24.998046875	79.5204315185547
1695306	28.1914672851562	76.4515991210938
1695309	25.5154724121094	90.051139831543
1695312	22.9371948242188	97.6721496582031
1695315	21.7618408203125	95.5193557739258
1695318	20.2666015625	92.0108337402344
1695321	19.1401062011719	87.4860534667969
1695324	19.3328857421875	86.2556533813477
1695327	27.2717590332031	71.7842102050781
1695330	30.5360107421875	65.9543533325195
1695333	25.2659912109375	90.559814453125
1695336	22.8349914550781	93.920295715332
1695339	21.6449584960938	87.7151870727539
1695342	20.4758911132812	86.2018051147461
1695345	20.0220947265625	84.0914077758789
1695348	20.0423583984375	85.2385101318359
1695351	26.485107421875	74.0216674804688
1695354	29.4295654296875	68.1080627441406
1695357	26.1820678710938	83.4549789428711
1695360	23.2326049804688	97.6989364624023
1695363	22.1194763183594	92.6303634643555
1695366	20.7093505859375	89.7903060913086
1695369	19.9202270507812	88.6828918457031
1695372	20.1338500976562	87.6282119750977
1695375	27.4488525390625	75.9132995605469
1695378	29.8145141601562	69.73828125
1695381	27.0643310546875	83.3441009521484
1695384	24.1803894042969	98.53955078125
1695387	22.9085693359375	98.0609664916992
1695390	21.5704956054688	96.0485687255859
1695393	20.1795349121094	89.3768692016602
1695396	20.3361206054688	86.6835327148438
1695399	26.991943359375	73.1615676879883
1695402	31.3701171875	66.0042572021484
1695405	28.9746704101562	74.3508071899414
1695408	24.69970703125	97.046745300293
1695411	23.443603515625	98.2701110839844
1695414	22.1771240234375	94.7341690063477
1695417	20.6125793457031	90.2213439941406
1695420	20.538330078125	86.9926910400391
1695423	27.747802734375	72.1938705444336
1695426	31.3830871582031	61.3940048217773
1695429	30.1454467773438	68.6869583129883
1695432	25.0073547363281	93.616455078125
1695435	23.4278564453125	97.6796875
1695438	22.6436157226562	97.4277801513672
1695441	21.6812744140625	92.6285095214844
1695444	20.9418334960938	89.8774871826172
1695447	26.6926574707031	73.6908493041992
1695450	30.3341064453125	67.8385620117188
1695453	29.8907470703125	77.2630004882812
1695456	24.7512817382812	96.8133316040039
1695459	23.5961303710938	97.8790740966797
1695462	22.8741455078125	97.0076675415039
1695465	21.9022827148438	94.2827835083008
1695468	21.4774780273438	93.508918762207
1695471	26.7567138671875	87.3085327148438
1695474	30.2423706054688	77.8924179077148
1695477	28.8294067382812	80.25048828125
1695480	24.540283203125	91.5223770141602
1695483	22.6764221191406	97.7257385253906
1695486	21.6991577148438	95.1980972290039
1695489	21.4678955078125	94.145866394043
1695492	22.0679931640625	95.9565124511719
1695495	25.7017211914062	87.2245483398438
1695498	27.6632995605469	84.4750213623047
1695501	27.1052856445312	83.3297576904297
1695504	23.8284912109375	92.8520126342773
1695507	22.2222900390625	98.1197357177734
1695510	22.2634887695312	97.3687362670898
1695513	22.321533203125	96.5858688354492
1695516	22.4729614257812	98.3276290893555
1695519	23.9151611328125	96.4419097900391
1695522	27.8231201171875	84.6040344238281
1695525	26.878173828125	85.4901351928711
1695528	24.1823120117188	93.7594833374023
1695531	22.628662109375	97.6441040039062
1695534	22.18798828125	95.1662750244141
1695537	22.546142578125	95.9454040527344
1695540	22.3435363769531	97.741096496582
1695543	24.8474731445312	91.3569030761719
1695546	27.4616394042969	84.4401245117188
1695549	26.9297485351562	84.5120544433594
1695552	23.3694152832031	95.7364196777344
1695555	22.19140625	97.5017395019531
1695558	21.8005981445312	94.9452056884766
1695561	21.4563903808594	94.4203262329102
1695564	21.9385986328125	96.5682983398438
1695567	24.6126098632812	91.3654708862305
1695570	28.6706848144531	79.3664627075195
1695573	27.3446655273438	81.7561340332031
1695576	23.2579345703125	94.6552886962891
1695579	21.9768676757812	97.334358215332
1695582	21.8097534179688	95.9878768920898
1695585	21.578857421875	96.9188003540039
1695588	21.4257507324219	95.9848480224609
1695591	22.9879455566406	96.2294311523438
1695594	26.5972900390625	83.43408203125
1695597	25.9571533203125	83.7179946899414
1695600	22.77734375	92.9086227416992
1695603	21.3814697265625	96.8711776733398
1695606	21.1959228515625	95.642578125
1695609	21.0236206054688	96.5665817260742
1695612	21.0670166015625	96.0474319458008
1695615	23.4084167480469	95.3801116943359
1695618	28.2776489257812	80.6374893188477
1695621	27.250244140625	81.8586120605469
1695624	22.8137512207031	92.0191955566406
1695627	21.6148071289062	97.0945663452148
1695630	21.2920532226562	95.6541442871094
1695633	21.3674621582031	96.9806442260742
1695636	21.40576171875	97.3448944091797
1695639	24.737060546875	87.093864440918
1695642	29.0339050292969	76.1943206787109
1695645	28.2057495117188	78.3975448608398
1695648	23.7355651855469	90.8616790771484
1695651	21.8539428710938	96.6862487792969
1695654	21.7163696289062	96.6176605224609
1695657	21.7033081054688	94.7936477661133
1695660	21.8209838867188	96.2229766845703
1695663	24.3272705078125	91.9528961181641
1695666	28.623291015625	82.1261520385742
1695669	28.5059204101562	81.3713150024414
1695672	24.0303039550781	93.9570083618164
1695675	22.6321716308594	96.9374008178711
1695678	22.4698486328125	97.2733917236328
1695681	22.2792053222656	96.978515625
1695684	22.2886962890625	97.5097122192383
1695687	24.0653076171875	96.1067733764648
1695690	28.5115966796875	83.5904693603516
1695693	26.8740234375	88.3237915039062
1695696	23.7514953613281	97.4888458251953
1695699	23.1148071289062	98.1095733642578
1695702	22.7847290039062	98.3646850585938
1695705	22.414306640625	98.7682647705078
1695708	22.2255249023438	97.5911560058594
1695711	24.8812866210938	91.6655197143555
1695714	28.8115844726562	82.3469543457031
1695717	25.3517150878906	94.3911514282227
1695720	23.3101196289062	97.5923843383789
1695723	23.0709838867188	97.8617935180664
1695726	22.8316650390625	98.3152847290039
1695729	22.2685546875	97.0920104980469
1695732	22.3331298828125	97.9526748657227
1695735	26.3425598144531	86.050537109375
1695738	29.5783996582031	77.4717864990234
1695741	28.6356201171875	80.409912109375
1695744	24.2688598632812	91.78955078125
1695747	22.9752197265625	97.8087921142578
1695750	22.3128051757812	98.1500701904297
1695753	21.6998901367188	95.6608276367188
1695756	21.6670532226562	91.1738204956055
1695759	27.7867431640625	77.9081878662109
1695762	30.4899597167969	76.5978164672852
1695765	27.2879943847656	85.5680694580078
1695768	24.3555297851562	98.0400543212891
1695771	23.5149536132812	98.6323471069336
1695774	22.9320068359375	98.7466201782227
1695777	22.4657897949219	98.7142028808594
1695780	22.4076538085938	98.0002517700195
1695783	26.6892395019531	89.7610549926758
1695786	29.4515991210938	81.9841003417969
1695789	26.3867492675781	88.3515472412109
1695792	23.8700256347656	98.3008499145508
1695795	22.8597106933594	98.5138549804688
1695798	22.3716430664062	97.8129959106445
1695801	21.9267272949219	95.5402221679688
1695804	21.9971313476562	92.9883575439453
1695807	27.8043212890625	81.9480133056641
1695810	30.320068359375	77.1821060180664
1695813	27.4129028320312	83.7114944458008
1695816	24.1835021972656	98.0166931152344
1695819	23.1434631347656	98.5055160522461
1695822	22.6080017089844	98.7988204956055
1695825	22.19921875	98.2995223999023
1695828	21.8704223632812	93.1382141113281
1695831	28.3414306640625	80.3734436035156
1695834	30.4450988769531	78.5734481811523
1695837	26.8657531738281	86.2842407226562
1695840	24.215087890625	98.3525772094727
1695843	23.2693481445312	98.5784530639648
1695846	22.4996948242188	97.6832580566406
1695849	21.6805725097656	95.8594131469727
1695852	21.4780883789062	93.2751693725586
1695855	26.4406127929688	85.5547103881836
1695858	29.5691528320312	80.6830749511719
1695861	26.225830078125	88.9113006591797
1695864	23.2167358398438	97.4916915893555
1695867	22.3110961914062	98.3850021362305
1695870	21.7116088867188	97.5496215820312
1695873	21.0596313476562	95.5396347045898
1695876	20.7421875	93.4633636474609
1695879	25.1898193359375	87.9014358520508
1695882	27.4676513671875	84.0646438598633
1695885	26.3373107910156	86.9181213378906
1695888	23.3289794921875	97.8371124267578
1695891	22.4264526367188	98.0049362182617
1695894	22.1416931152344	96.7516250610352
1695897	21.8138427734375	96.4851379394531
1695900	21.8289794921875	97.3311538696289
1695903	24.6239013671875	91.9041366577148
1695906	27.5635375976562	85.3858795166016
1695909	26.6988220214844	86.3853530883789
1695912	23.7172241210938	93.8131637573242
1695915	22.7850952148438	98.3826599121094
1695918	22.1967163085938	97.4127502441406
1695921	21.7164001464844	95.9477844238281
1695924	21.9262390136719	95.7598037719727
1695927	26.6896362304688	87.2406845092773
1695930	29.5994873046875	79.4600830078125
1695933	27.8573608398438	84.2759323120117
1695936	24.0227966308594	91.8591537475586
1695939	22.9249877929688	94.1273727416992
1695942	21.4086608886719	96.312614440918
1695945	20.0668640136719	94.4726486206055
1695948	21.3142395019531	97.20703125
1695951	25.9076843261719	87.4929580688477
1695954	29.554443359375	78.9427947998047
1695957	28.3472595214844	80.0285949707031
1695960	24.1663818359375	91.9026031494141
1695963	22.9468994140625	97.8119964599609
1695966	22.2518615722656	97.0997161865234
1695969	21.7030639648438	96.3816909790039
1695972	21.7532958984375	93.7648162841797
1695975	26.775634765625	83.7831649780273
1695978	29.8744812011719	76.2144317626953
1695981	27.2484130859375	82.9009628295898
1695984	23.5291137695312	96.2524108886719
1695987	22.146484375	97.9689712524414
1695990	21.6845092773438	96.545654296875
1695993	21.2257690429688	93.7478790283203
1695996	20.2575988769531	92.0006866455078
1695999	23.8583374023438	93.1664123535156
1696002	28.7193908691406	82.4190063476562
1696005	25.1348266601562	90.2556991577148
1696008	22.92919921875	96.5958862304688
1696011	22.2792358398438	98.419807434082
1696014	21.7313232421875	96.0969467163086
1696017	21.5743713378906	91.4492797851562
1696020	20.3738403320312	89.2498779296875
1696023	26.3387756347656	83.6999435424805
1696026	28.0440673828125	81.4603805541992
1696029	25.587646484375	90.5249328613281
1696032	23.4473266601562	98.3996429443359
1696035	22.625	98.5791320800781
1696038	22.0201110839844	96.7955169677734
1696041	21.1091918945312	93.8220596313477
1696044	20.5020141601562	90.1533279418945
1696047	26.5407104492188	81.7822341918945
1696050	28.2351684570312	80.8533020019531
1696053	25.4237670898438	89.3106307983398
1696056	22.7720336914062	96.9990081787109
1696059	22.0765991210938	97.6450500488281
1696062	21.2324829101562	95.7704086303711
1696065	20.1258850097656	94.5245666503906
1696068	19.59130859375	93.7867813110352
1696071	26.4545288085938	84.4631195068359
1696074	29.1071166992188	78.5683746337891
1696077	27.4108276367188	84.5227508544922
1696080	23.8506774902344	93.1471557617188
1696083	22.3123779296875	97.2088165283203
1696086	21.6583251953125	97.8422698974609
1696089	21.0650024414062	95.5814590454102
1696092	21.2120361328125	95.9427947998047
1696095	23.5314025878906	93.7237396240234
1696098	27.2792358398438	83.901496887207
1696101	26.6944885253906	84.5901107788086
1696104	22.9384765625	92.9915618896484
1696107	21.7458801269531	95.0645141601562
1696110	21.3741455078125	97.2176284790039
1696113	21.395751953125	96.648307800293
1696116	21.3717651367188	96.1111221313477
1696119	26.4351806640625	84.6519775390625
1696122	27.6908569335938	82.8596878051758
1696125	27.3378295898438	82.3931274414062
1696128	23.4114074707031	90.92529296875
1696131	21.7017517089844	96.9488754272461
1696134	21.7273559570312	96.1229553222656
1696137	21.5752868652344	96.4507675170898
1696140	21.5670776367188	97.6165618896484
1696143	24.6782836914062	89.3274383544922
1696146	27.4682922363281	84.1174697875977
1696149	26.7466430664062	85.9533996582031
1696152	23.1275329589844	93.9034576416016
1696155	22.0221252441406	97.1072311401367
1696158	21.5980834960938	98.3045043945312
1696161	21.3301086425781	97.1320724487305
1696164	21.3534545898438	98.021858215332
1696167	22.6307067871094	98.3630523681641
1696170	25.7139892578125	86.4578247070312
1696173	26.961669921875	84.0260162353516
1696176	23.2689819335938	94.5246505737305
1696179	21.6935119628906	98.1131744384766
1696182	21.6785888671875	96.8598403930664
1696185	20.9091186523438	97.0828399658203
1696188	20.8921508789062	94.5024795532227
1696191	24.8950805664062	88.9238433837891
1696194	27.8895263671875	82.7723159790039
1696197	25.8738403320312	84.9971618652344
1696200	23.1290588378906	91.3961791992188
1696203	21.8856811523438	96.4075546264648
1696206	21.4035034179688	97.5635757446289
1696209	21.1246337890625	96.3230743408203
1696212	20.8736267089844	96.6780853271484
1696215	25.9634399414062	87.0372467041016
1696218	28.9854736328125	79.8648452758789
1696221	25.2218627929688	88.8219985961914
1696224	22.8059692382812	97.2194519042969
1696227	22.1981201171875	98.4972839355469
1696230	21.7727661132812	98.4151153564453
1696233	21.5571899414062	97.209342956543
1696236	21.58642578125	98.2794418334961
1696239	25.7815551757812	86.4673156738281
1696242	27.6419982910156	83.46484375
1696245	24.886474609375	89.7639007568359
1696248	22.8908996582031	93.2873687744141
1696251	21.8999938964844	98.2992553710938
1696254	21.2713928222656	97.4072189331055
1696257	20.7265930175781	95.1859359741211
1696260	20.9661865234375	97.0031890869141
1696263	23.6038513183594	91.7621078491211
1696266	27.6298828125	82.2508697509766
1696269	27.416748046875	82.7018051147461
1696272	23.0343322753906	95.5975189208984
1696275	21.9353637695312	98.2237930297852
1696278	21.6224975585938	97.2887573242188
1696281	21.305908203125	96.9759368896484
1696284	21.3851928710938	96.936408996582
1696287	22.8046264648438	97.2702713012695
1696290	27.0465087890625	84.1560974121094
1696293	26.1070556640625	86.1072082519531
1696296	22.8726806640625	92.6045379638672
1696299	21.87890625	95.8882675170898
1696302	21.4728393554688	97.1498870849609
1696305	20.8587036132812	96.4254531860352
1696308	19.8268432617188	96.4459228515625
1696311	22.892822265625	94.1385040283203
1696314	26.7612915039062	85.7624816894531
1696317	25.1231384277344	87.5545425415039
1696320	22.5618896484375	92.5296173095703
1696323	21.1234741210938	96.8111724853516
1696326	21.1636352539062	96.2350311279297
1696329	21.189453125	97.6682052612305
1696332	21.1337280273438	96.4017944335938
1696335	22.4169311523438	98.8341445922852
1696338	23.9224853515625	92.3073883056641
1696341	24.1686706542969	91.8418884277344
1696344	22.0157165527344	96.9400024414062
1696347	21.3876953125	97.1233520507812
1696350	21.1107177734375	97.2322387695312
1696353	21.072509765625	97.2383270263672
1696356	21.0507202148438	95.9859390258789
1696359	22.2020263671875	98.4475860595703
1696362	22.74609375	95.549674987793
1696365	24.0693359375	89.8426132202148
1696368	22.2786254882812	93.6104965209961
1696371	21.038818359375	96.4809494018555
1696374	21.0946350097656	96.3617248535156
1696377	21.0358276367188	97.3765106201172
1696380	21.1078491210938	97.5067672729492
1696383	23.2246704101562	98.5541915893555
1696386	25.6036071777344	91.4023971557617
1696389	25.6650695800781	90.4267120361328
1696392	23.4254760742188	96.852653503418
1696395	22.4334106445312	96.9253005981445
1696398	22.050537109375	98.7463226318359
1696401	21.5851440429688	96.9675140380859
1696404	21.2176208496094	97.2592315673828
1696407	22.55810546875	95.5077514648438
1696410	26.4508666992188	83.6726455688477
1696413	24.8961791992188	88.6079711914062
1696416	21.895263671875	96.8811264038086
1696419	21.393798828125	96.9993438720703
1696422	21.2821044921875	96.2200241088867
1696425	21.0852661132812	97.0249252319336
1696428	21.1002197265625	97.3764572143555
1696431	22.3775634765625	98.8658905029297
1696434	24.8226928710938	90.773078918457
1696437	24.3907470703125	91.2040557861328
1696440	22.2908020019531	95.7130279541016
1696443	21.3736572265625	97.5300903320312
1696446	21.04150390625	98.0678787231445
1696449	21.0455322265625	97.7554244995117
1696452	21.0741577148438	97.4992980957031
1696455	22.5165405273438	98.5538787841797
1696458	25.68310546875	88.9076538085938
1696461	26.330078125	86.3624114990234
1696464	23.217529296875	93.4533233642578
1696467	21.6829833984375	97.9600982666016
1696470	21.60400390625	97.2812576293945
1696473	21.4598999023438	97.4802856445312
1696476	21.4368896484375	97.5491943359375
1696479	22.6646423339844	97.6690979003906
1696482	23.1322631835938	97.1985244750977
1696485	21.9954833984375	96.247184753418
1696488	21.3975830078125	97.1509704589844
1696491	21.3075561523438	97.1702499389648
1696494	21.1582641601562	97.5326995849609
1696497	20.9850463867188	96.8832397460938
1696500	20.97509765625	95.7292404174805
1696503	22.0143737792969	96.7387390136719
1696506	24.865234375	88.0242919921875
1696509	24.5672607421875	90.0380477905273
1696512	22.0542602539062	97.4156723022461
1696515	21.5082702636719	97.9039154052734
1696518	21.2977905273438	97.6083831787109
1696521	21.1840515136719	97.0699234008789
1696524	21.1054382324219	96.4980316162109
1696527	23.6809997558594	90.8263626098633
1696530	25.6185302734375	86.1569442749023
1696533	23.2925415039062	96.5154113769531
1696536	21.8218994140625	97.5802536010742
1696539	21.3731079101562	97.6826553344727
1696542	21.1117248535156	98.4813613891602
1696545	20.9144287109375	98.0585556030273
1696548	21.0286254882812	97.8643798828125
1696551	22.5144653320312	97.2562866210938
1696554	26.322509765625	84.7634048461914
1696557	25.712158203125	85.3700256347656
1696560	22.6493530273438	93.3721160888672
1696563	21.2556762695312	96.8589248657227
1696566	21.2848205566406	96.2764129638672
1696569	21.17919921875	95.5244750976562
1696572	21.2510375976562	96.393196105957
1696575	25.6491088867188	86.1626205444336
1696578	27.6044006347656	82.7362365722656
1696581	27.299072265625	81.9218292236328
1696584	23.2932739257812	90.4690322875977
1696587	21.5076293945312	97.1304626464844
1696590	21.0774536132812	97.1265411376953
1696593	21.042236328125	96.1559219360352
1696596	21.1043395996094	96.0122375488281
1696599	22.5887451171875	96.1392059326172
1696602	23.9429321289062	92.0074996948242
1696605	22.9264526367188	94.8162536621094
1696608	21.3681640625	95.9583587646484
1696611	21.15234375	96.0382614135742
1696614	20.84765625	96.1781539916992
1696617	20.5392456054688	96.0125350952148
1696620	20.4805297851562	95.9828643798828
1696623	22.5404052734375	94.1987762451172
1696626	25.7245483398438	82.1017608642578
1696629	25.9578552246094	82.529541015625
1696632	22.3518676757812	91.7008209228516
1696635	21.1003112792969	96.5289611816406
1696638	20.7947082519531	96.7457275390625
1696641	20.6272583007812	96.4383163452148
1696644	20.6449279785156	95.4573211669922
1696647	22.56103515625	93.0105133056641
1696650	26.0506896972656	82.5303497314453
1696653	25.4920349121094	84.6215515136719
1696656	22.6168823242188	91.9768981933594
1696659	20.8755493164062	97.8401870727539
1696662	20.9440612792969	96.6716690063477
1696665	20.9682006835938	97.6860656738281
1696668	21.1046752929688	97.3535461425781
1696671	24.3284912109375	88.8992538452148
1696674	26.8363037109375	83.77880859375
1696677	25.1087036132812	87.1176452636719
1696680	22.0323486328125	95.2178649902344
1696683	21.1621704101562	97.1293106079102
1696686	20.9959716796875	97.5396347045898
1696689	20.7922973632812	96.8749923706055
1696692	20.7425231933594	96.6327972412109
1696695	22.212646484375	98.1477203369141
1696698	24.9627685546875	86.9863815307617
1696701	24.4965209960938	88.25390625
1696704	21.8153686523438	95.6043090820312
1696707	21.0315246582031	97.8843688964844
1696710	20.8046264648438	97.2554244995117
1696713	20.8067626953125	97.6392517089844
1696716	21.0624694824219	97.3043060302734
1696719	22.1237487792969	98.9989318847656
1696722	23.4018859863281	93.7796096801758
1696725	25.892578125	83.7235107421875
1696728	22.5903015136719	93.8926239013672
1696731	20.96923828125	97.9462585449219
1696734	20.9320678710938	96.6659927368164
1696737	21.0548095703125	96.7087554931641
1696740	21.1656494140625	97.5703582763672
1696743	22.9833374023438	95.5149230957031
1696746	27.2934265136719	83.0385055541992
1696749	27.344482421875	85.0339431762695
1696752	23.368408203125	93.6778945922852
1696755	22.1146850585938	96.6829376220703
1696758	21.675048828125	97.5286865234375
1696761	21.3237915039062	97.2964935302734
1696764	21.2305297851562	96.9936828613281
1696767	24.0697631835938	90.2601547241211
1696770	27.8720703125	82.5149230957031
1696773	27.6078186035156	83.1118774414062
1696776	23.034423828125	91.1812362670898
1696779	21.5254516601562	97.0849456787109
1696782	21.3001708984375	96.8950576782227
1696785	21.4183044433594	96.9643325805664
1696788	21.4181213378906	97.9063262939453
1696791	22.5200805664062	97.0941390991211
1696794	25.8064880371094	86.8927841186523
1696797	25.7012939453125	84.7666015625
1696800	22.7620544433594	93.01416015625
1696803	21.2982482910156	96.6827392578125
1696806	21.2925415039062	96.9657745361328
1696809	21.1178894042969	97.4127807617188
1696812	21.0361633300781	97.2845611572266
1696815	22.2664184570312	97.7590713500977
1696818	26.0237121582031	85.4952239990234
1696821	26.2471008300781	85.0743713378906
1696824	22.7647705078125	95.4896392822266
1696827	21.6296691894531	97.7710494995117
1696830	21.6436157226562	97.0105667114258
1696833	21.5968017578125	97.7238006591797
1696836	21.6090087890625	96.177116394043
1696839	22.8704833984375	98.231689453125
1696842	26.4426879882812	85.732307434082
1696845	27.5049438476562	82.1582946777344
1696848	23.3228149414062	94.0567169189453
1696851	21.8717956542969	97.6110916137695
1696854	21.9654235839844	97.1985778808594
1696857	21.9599609375	97.8101425170898
1696860	21.95751953125	96.6158142089844
1696863	23.1741638183594	98.2091445922852
1696866	26.638916015625	86.3804779052734
1696869	25.9342041015625	86.628532409668
1696872	22.9308776855469	95.9717178344727
1696875	21.9330749511719	97.8288116455078
1696878	21.836181640625	97.1701812744141
1696881	21.4987182617188	96.4663391113281
1696884	21.312255859375	96.0749969482422
1696887	23.2787170410156	94.8846664428711
1696890	25.5416259765625	84.1344985961914
1696893	24.545654296875	87.7266540527344
1696896	21.83251953125	94.6617279052734
1696899	21.2143249511719	96.0284729003906
1696902	20.7682495117188	95.8047561645508
1696905	20.7239990234375	96.1056671142578
1696908	20.6080322265625	96.2081832885742
1696911	25.0396118164062	83.4512939453125
1696914	28.132568359375	79.0895080566406
1696917	26.966796875	83.8241958618164
1696920	23.0413208007812	92.8336868286133
1696923	21.8147583007812	97.2751312255859
1696926	21.6927795410156	98.2026824951172
1696929	21.3879089355469	97.606071472168
1696932	21.3626098632812	95.736572265625
1696935	22.51708984375	98.5051574707031
1696938	23.8009643554688	92.0457077026367
1696941	25.12255859375	89.421630859375
1696944	22.3428955078125	96.1178131103516
1696947	21.4866943359375	97.8991851806641
1696950	21.2307739257812	96.6357955932617
1696953	21.102294921875	96.670524597168
1696956	21.0719299316406	95.3739929199219
1696959	22.4490966796875	95.8872909545898
1696962	26.2430114746094	85.2942810058594
1696965	26.4983825683594	85.3315277099609
1696968	23.23681640625	94.4351043701172
1696971	21.9468994140625	97.4950180053711
1696974	21.8215942382812	97.3210983276367
1696977	21.9197998046875	98.2426223754883
1696980	21.840576171875	96.8016510009766
1696983	23.4405212402344	98.3425521850586
1696986	25.9761657714844	88.2372589111328
1696989	25.4542236328125	89.5603256225586
1696992	23.3089904785156	94.4978179931641
1696995	21.9086303710938	97.9517517089844
1696998	21.452392578125	97.4402008056641
1697001	21.4028015136719	96.8224029541016
1697004	21.5897827148438	97.5576171875
1697007	23.7693481445312	96.8698425292969
1697010	28.54541015625	84.1023178100586
1697013	25.55322265625	91.3966522216797
1697016	23.3968505859375	98.4917984008789
1697019	22.5531616210938	98.6448211669922
1697022	22.0456848144531	97.8041381835938
1697025	21.5545043945312	96.2605285644531
1697028	21.1094970703125	95.1892013549805
1697031	23.2097778320312	98.8248748779297
1697034	23.6769409179688	98.8029098510742
1697037	22.9358825683594	98.2106475830078
1697040	21.9120788574219	98.322868347168
1697043	21.2615966796875	97.5849075317383
1697046	20.7734985351562	97.7641830444336
1697049	20.0503234863281	91.6833267211914
1697052	19.0553588867188	86.1530380249023
1697055	22.6052551269531	95.9977722167969
1697058	28.8015747070312	83.8387298583984
1697061	28.3235778808594	85.8239822387695
1697064	23.6427307128906	94.8983612060547
1697067	22.4335327148438	96.3842010498047
1697070	21.6149291992188	96.9602737426758
1697073	21.2053833007812	95.7622756958008
1697076	21.2058715820312	96.5682983398438
1697079	22.6889038085938	97.5334091186523
1697082	25.3341674804688	88.4737777709961
1697085	23.7021484375	93.9988632202148
1697088	21.8794250488281	95.2493667602539
1697091	21.2806091308594	96.6996307373047
1697094	21.0281372070312	97.3145446777344
1697097	20.9872131347656	97.4704895019531
1697100	21.0635986328125	96.8748550415039
1697103	22.3680114746094	98.0949401855469
1697106	23.4048461914062	92.4855880737305
1697109	22.6732788085938	94.4272384643555
1697112	21.2188720703125	97.8113250732422
1697115	20.9818725585938	97.8487243652344
1697118	20.8637084960938	98.2002716064453
1697121	20.7255554199219	98.019287109375
1697124	20.818115234375	97.6385498046875
1697127	22.4258117675781	97.9720840454102
1697130	25.380615234375	88.4519653320312
1697133	26.119140625	86.3803939819336
1697136	22.99853515625	98.6585464477539
1697139	22.5075073242188	98.9402313232422
1697142	21.7774047851562	97.9786376953125
1697145	21.0845336914062	91.6077346801758
1697148	19.939453125	89.3522338867188
1697151	26.8582458496094	79.8336791992188
1697154	29.5069580078125	77.6411895751953
1697157	25.7831420898438	87.8421936035156
1697160	23.245361328125	97.3980560302734
1697163	22.727783203125	98.3699264526367
1697166	22.2785034179688	97.6167144775391
1697169	21.8829956054688	97.2504730224609
1697172	21.6942138671875	97.8539581298828
1697175	23.1040649414062	96.5219421386719
1697178	27.14697265625	85.1258544921875
1697181	27.2591552734375	85.4989852905273
1697184	23.5407409667969	92.089973449707
1697187	22.3597106933594	96.8291931152344
1697190	21.7138061523438	96.6124114990234
1697193	21.7278442382812	95.7746658325195
1697196	21.5615234375	95.3895111083984
1697199	24.2915344238281	93.5232849121094
1697202	27.7860412597656	84.3397598266602
1697205	25.6588745117188	89.4359130859375
1697208	23.25341796875	96.9786758422852
1697211	22.5510864257812	98.7187957763672
1697214	21.9829711914062	98.0866622924805
1697217	21.5737915039062	97.0655517578125
1697220	21.4280395507812	94.7916564941406
1697223	25.5540771484375	84.4868469238281
1697226	27.1677551269531	80.3994522094727
1697229	23.6939697265625	97.5892562866211
1697232	22.5796203613281	98.3645477294922
1697235	21.78955078125	98.1590270996094
1697238	21.1599731445312	96.3956680297852
1697241	20.3486938476562	92.7495651245117
1697244	19.7876586914062	91.8292694091797
1697247	22.04150390625	98.5154190063477
1697250	23.16015625	97.6432342529297
1697253	24.4725952148438	88.292724609375
1697256	22.4430847167969	93.2585906982422
1697259	20.8961181640625	97.080436706543
1697262	20.499267578125	96.5906829833984
1697265	20.4039916992188	94.373046875
1697268	19.7947998046875	92.3338241577148
1697271	26.1476440429688	86.303466796875
1697274	26.9390258789062	85.5643692016602
1697277	26.4578857421875	84.2745666503906
1697280	22.640625	95.2045059204102
1697283	21.707763671875	96.6495895385742
1697286	21.238525390625	97.9760284423828
1697289	20.8915405273438	97.1751098632812
1697292	20.8912353515625	97.2586364746094
1697295	22.5646362304688	96.7470245361328
1697298	26.3050537109375	87.7604446411133
1697301	26.1546020507812	87.1832275390625
1697304	22.8854064941406	95.0942840576172
1697307	22.2287292480469	97.241325378418
1697310	21.9296875	98.0528564453125
1697313	21.2999267578125	95.9140090942383
1697316	21.2816772460938	96.6429748535156
1697319	24.1566467285156	87.7593994140625
1697322	28.2686157226562	79.7684631347656
1697325	26.5779724121094	85.3122253417969
1697328	23.1502685546875	94.025146484375
1697331	22.2023620605469	98.1932144165039
1697334	21.5289611816406	97.7185821533203
1697337	21.2097778320312	97.6406326293945
1697340	20.9041137695312	96.1585845947266
1697343	24.9041137695312	88.8250579833984
1697346	26.9972534179688	85.135986328125
1697349	26.2711486816406	86.9646606445312
1697352	23.0064086914062	94.1573944091797
1697355	21.968994140625	96.5433883666992
1697358	21.3540649414062	97.18701171875
1697361	20.8992004394531	96.1466827392578
1697364	21.2549438476562	96.5302276611328
1697367	23.2341918945312	93.8481597900391
1697370	27.8217163085938	79.6349945068359
1697373	27.3508911132812	79.519905090332
1697376	22.6800231933594	95.8969955444336
1697379	21.4058227539062	97.2432327270508
1697382	21.2671813964844	95.7547302246094
1697385	21.0042114257812	96.6810302734375
1697388	20.9137268066406	95.4444732666016
1697391	22.681396484375	95.1006774902344
1697394	26.206787109375	84.7293472290039
1697397	24.8175659179688	90.4543685913086
1697400	22.2213745117188	96.7555541992188
1697403	21.5953063964844	96.8232955932617
1697406	21.423583984375	95.7100677490234
1697409	21.112548828125	95.4328308105469
1697412	21.3930053710938	96.0750350952148
1697415	25.0933837890625	88.6925201416016
1697418	27.865234375	83.2564544677734
1697421	27.1222534179688	85.4019622802734
1697424	23.4364013671875	94.1448822021484
1697427	22.3407287597656	95.5101928710938
1697430	21.64111328125	97.8817825317383
1697433	21.5616760253906	95.9195404052734
1697436	21.4967346191406	97.3350677490234
1697439	23.1178588867188	97.9992828369141
1697442	25.7406616210938	87.6762237548828
1697445	24.7416076660156	90.553840637207
1697448	22.2274780273438	96.9277572631836
1697451	21.65673828125	98.2153472900391
1697454	21.1846618652344	98.2982330322266
1697457	20.8146362304688	98.0763320922852
1697460	20.7271728515625	97.2463684082031
1697463	22.4745483398438	95.55322265625
1697466	24.3747863769531	90.8917541503906
1697469	24.3564453125	90.3165969848633
1697472	22.4320678710938	95.7956085205078
1697475	21.4567565917969	98.5304870605469
1697478	21.1954650878906	98.3849945068359
1697481	20.8057250976562	97.184196472168
1697484	20.8587036132812	97.3632354736328
1697487	22.5450439453125	94.5270233154297
1697490	27.6976013183594	80.0647888183594
1697493	26.5223083496094	80.9633483886719
1697496	22.9356384277344	91.8301544189453
1697499	21.3233032226562	95.3580856323242
1697502	21.2767944335938	97.2879638671875
1697505	20.8302612304688	95.0535202026367
1697508	20.886962890625	94.0881729125977
1697511	26.2250366210938	82.0416641235352
1697514	29.2945861816406	74.4653396606445
1697517	28.027587890625	80.959846496582
1697520	23.2645263671875	91.8633728027344
1697523	21.8879089355469	96.5426940917969
1697526	20.4862670898438	95.0086135864258
1697529	19.10986328125	92.6139297485352
1697532	18.7029113769531	93.1360321044922
1697535	24.6806030273438	91.4444274902344
1697538	28.0274353027344	82.0581893920898
1697541	26.8409729003906	84.1862411499023
1697544	22.9180908203125	92.7896423339844
1697547	21.7131958007812	96.4562072753906
1697550	21.0432739257812	96.0601654052734
1697553	20.5637817382812	97.1523284912109
1697556	20.6459350585938	94.8622589111328
1697559	24.1927795410156	87.8917694091797
1697562	28.0289306640625	80.2617492675781
1697565	27.0905151367188	81.8147201538086
1697568	22.5470581054688	94.9064254760742
1697571	21.7376403808594	97.2147750854492
1697574	21.5120239257812	97.0995712280273
1697577	21.3112182617188	97.1339950561523
1697580	21.2427978515625	96.5520935058594
1697583	22.7385864257812	92.6227722167969
1697586	25.8923950195312	85.5606002807617
1697589	25.9765930175781	84.5514144897461
1697592	22.825927734375	91.632438659668
1697595	21.3017578125	96.2832946777344
1697598	21.2739868164062	96.5961990356445
1697601	20.9207763671875	96.5664367675781
1697604	21.0059814453125	96.9562454223633
1697607	22.8300476074219	95.4226760864258
1697610	26.7574157714844	84.4007797241211
1697613	27.6286010742188	79.7802658081055
1697616	23.1043090820312	92.9302368164062
1697619	21.5013122558594	96.6437606811523
1697622	21.5608520507812	97.3357849121094
1697625	21.302978515625	97.3174057006836
1697628	21.3324279785156	95.6718978881836
1697631	22.6834716796875	97.3733139038086
1697634	26.4668579101562	86.1765594482422
1697637	27.0689697265625	83.612678527832
1697640	22.6537475585938	94.9738845825195
1697643	21.6011962890625	95.8609848022461
1697646	21.3321533203125	96.2139739990234
1697649	20.8753662109375	93.372917175293
1697652	20.5012817382812	92.9188995361328
1697655	24.781005859375	86.2084579467773
1697658	27.367919921875	81.7982940673828
1697661	26.1206665039062	81.8151397705078
1697664	22.3751831054688	94.9055862426758
1697667	21.0592346191406	95.9985046386719
1697670	20.8804931640625	96.1860046386719
1697673	20.90869140625	95.8842620849609
1697676	20.9180908203125	97.0123062133789
1697679	22.9664306640625	92.1206359863281
1697682	26.3847045898438	83.5197525024414
1697685	26.091064453125	83.3274612426758
1697688	22.3378295898438	94.0385894775391
1697691	20.974609375	96.9411392211914
1697694	20.8705139160156	96.0677108764648
1697697	20.7330017089844	95.7266845703125
1697700	20.9974365234375	96.9475631713867
1697703	22.3059692382812	98.2548980712891
1697706	24.1961669921875	93.8693084716797
1697709	27.0005493164062	83.4593276977539
1697712	22.7318115234375	95.9830017089844
1697715	21.8238830566406	96.8620529174805
1697718	21.545654296875	97.0726013183594
1697721	21.1114807128906	96.9453430175781
1697724	21.1999206542969	97.0131301879883
1697727	23.2643432617188	96.3887710571289
1697730	27.447509765625	84.3670349121094
1697733	26.3375244140625	86.9384078979492
1697736	22.80908203125	96.3315200805664
1697739	22.1096496582031	97.4248886108398
1697742	21.4999389648438	97.7308044433594
1697745	21.0221557617188	96.5783615112305
1697748	20.9710693359375	95.1269836425781
1697751	26.2677612304688	83.0567321777344
1697754	28.4879150390625	77.6096801757812
1697757	25.001220703125	89.8097381591797
1697760	22.2348937988281	97.715446472168
1697763	21.38623046875	98.2377014160156
1697766	20.6372680664062	95.9471206665039
1697769	19.262451171875	90.6409149169922
1697772	18.7918701171875	88.1142578125
1697775	26.20751953125	76.047966003418
1697778	26.5794982910156	76.5920104980469
1697781	23.8435974121094	96.5997467041016
1697784	21.8775939941406	97.8779602050781
1697787	20.842041015625	95.0019912719727
1697790	19.6406555175781	93.8346252441406
1697793	18.1814575195312	85.7406158447266
1697796	17.8187255859375	83.3085556030273
1697799	26.3231201171875	72.8275680541992
1697802	29.29052734375	70.2277221679688
[truncated: 6,761 more rows]
